# Supplementary material for: Synergistic combination of valproic acid and oncolytic parvovirus H-1PV as a potential therapy against cervical and pancreatic carcinomas
Source: PubMed Central journal article supplement (PMC3799578; doi:10.1002/emmm.201302796), 2013-09-17
Supplement: emmm0005-1537-SD5.pdf [file emmm0005-1537-SD5.pdf]

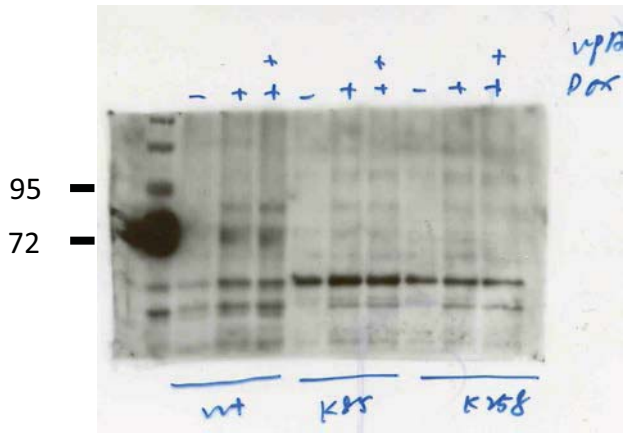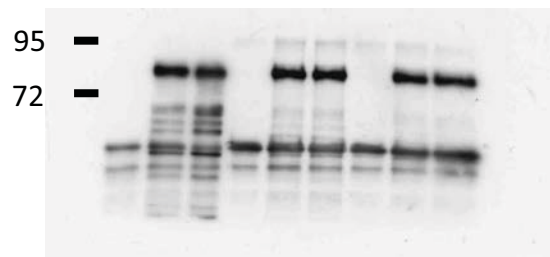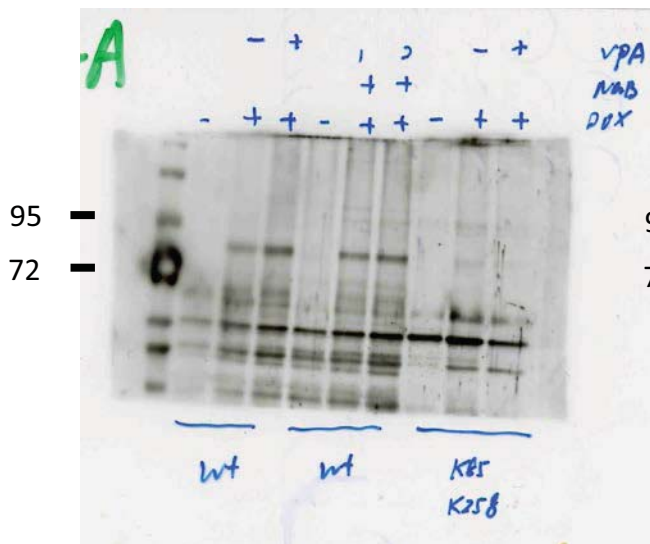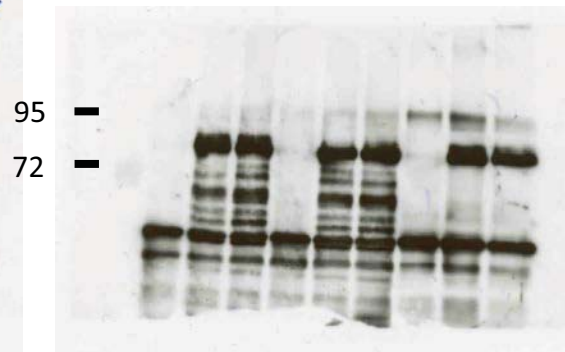

Fig. 5A and C
